# Supplementary material
Source: HighWire-hosted journal article supplement (https://www.cmaj.ca/highwire/filestream/77569/field_highwire_adjunct_files/1/200160-five-appendix2-at.pdf)
Supplement: 200160-five-appendix2-at.pdf [file 200160-five-appendix2-at.pdf]

## Appendix 2 (as submitted by authors): Supplementary table

### Recommended Targets for Cardiovascular Disease Risk Factors and Screening for Secondary Malignancy in Recipients of Allogeneic Stem Cell Transplant

| CVD Risk factor                     | Blood Pressure <sup>1</sup>                                                                 | Diabetes <sup>2</sup>                                                                                                      | Dyslipidemia <sup>3</sup>                                                                                              |
|-------------------------------------|---------------------------------------------------------------------------------------------|----------------------------------------------------------------------------------------------------------------------------|------------------------------------------------------------------------------------------------------------------------|
| Target                              | < 130/80mmHg                                                                                | A1C <= 6.5%                                                                                                                | LDL-C < 2.0 mmol/L                                                                                                     |
|                                     |                                                                                             |                                                                                                                            |                                                                                                                        |
| Malignancy                          | Colorectal                                                                                  | Breast                                                                                                                     | Other                                                                                                                  |
| Recommended screening <sup>4*</sup> | From age 50y, annual stool testing, sigmoidoscopy every 5 years, colonoscopy every 10 years | Annual mammogram/MRI from age 40y or, if prior radiation therapy (RT), from 8y post-RT or from age 25, whichever is sooner | Females: annual PAP**<br><br>Males: annual DRE +/- PSA from age 50 as guided by symptoms, family history and PSA level |

\* More intensive screening may be warranted depending on additional risk factors such as positive family history or symptoms

\*\* After the age of 30 years if there have been three consecutive normal results, assess if patients can change to every 3 years

#### References:

1. Whelton PK, Carey RM, Aronow WS, et al. 2017 ACC/AHA/AAPA/ABC/ACPM/AGS/APhA/ASH/ASPC/ NMA/PCNA Guideline for the Prevention, Detection, Evaluation, and Management of High Blood Pressure in Adults: Executive Summary: A Report of the American College of Cardiology/American Heart Association Task Force on Clinical Practice Guidelines. *Hypertension*. 2018;71(6):1269-1324.

2. Diabetes Canada Clinical Practice Guidelines Expert Committee. Diabetes Canada 2018 Clinical Practice Guidelines for the Prevention and Management of Diabetes in Canada. *Can J Diabetes*. 2018;42(Suppl 1):S1-S325.
3. Anderson TJ, Gregoire J, Pearson GJ et al. 2016 Canadian Cardiovascular Society Guidelines for the Management of Dyslipidemia for the Prevention of Cardiovascular Disease in the Adult. *Canadian Journal of Cardiology*. 2016; 32:1263-1282.
4. Inamoto Y, Shah NN, Savani BN, et al. Secondary solid cancer screening following hematopoietic cell transplantation. *Bone Marrow Transplant*. 2015;50(8):1013-1023.
